# Supplementary material for: Bioactive metabolites of Streptomyces misakiensis display broad-spectrum antimicrobial activity against multidrug-resistant bacteria and fungi
Source: Front Cell Infect Microbiol. 2023 Apr 24;13:1162721. doi: 10.3389/fcimb.2023.1162721 (PMC10165089; doi:10.3389/fcimb.2023.1162721)
Supplement: Supplementary file 17 [file Table_4.doc]

**Table 4S:** Liver and kidney function parameters of mice infected intranasally with *K. pneumoniae* and treated with gentamicin (10 mg/kg) and/or ursolic acid methyl ester(7.5 mg/kg)

| **Groups** | **ALT** | **AST** | **Albumin** | **Total protein** | **Total bilirubin** | **Direct bilirubin** | **Urea** | **Creatinine** |
| --- | --- | --- | --- | --- | --- | --- | --- | --- |
| **G1** | 42.49±0.606**c** | 58.27±0.433**b** | 1.33±0.121**b** | 2.78±0.080**d** | 2.40±0.057**a** | 1.13±0.184**a** | 56.63 ±0.502ab | 1.73±0.069b |
| **G2** | 57.43±1.131**a** | 65.23±1.068**a** | 3.42±0.057**a** | 2.70±0.254**d** | 1.38±0.046**b** | 0.57 ±0.282**bc** | 58.13±1.062a | 1.93±0.069a |
| **G3** | 27.57±1.050d | 38.60±0.848**d** | 3.40±0.063**a** | 3.60±0.103**c** | 1.23±0.34**cd** | 0.85 ±0.028**ab** | 38.87±0.588c | 0.80±0.057c |
| **G4** | 16.51±1.091e | 37.95±0.329d | 3.38±0.057a | 5.78±0.109a | 1.03±0.034e | 0.33±0.086c | 36.47±1.141c | 0.77±0.034c |
| **G5** | 46.33±0.508**b** | 54.27±0.560**c** | 3.37±0.017**a** | 5.74±0.132**a** | 1.30±0.053**dc** | 0.89 ±0.046**ab** | 54.67±0.646b | 1.93±0.034a |
| **G6** | 16.28±0.381**e** | 37.23±0.352**d** | 3.25±0.127**a** | 5.7 ±0.034**a** | 1.10±0.052**d** | 0.38 ±0.161**bc** | 39.33±0.600c | 0.93 ±0.086c |
| **G7** | 15.61±0.254**e** | 23.87±0.086**e** | 3.32±0.144**a** | 5.21±0.005**b** | 1.15±0.028**d** | 0.14 ±0.023**c** | 39.30±0.352c | 0.90±0.057c |

G1: Infected non-treated group; G2: Gentamicin-treated group, G3: Ursolic acid methyl ester*-*treated group; G4:Ursolic acid methyl ester-control negative group; G5:Gentamicin-control negative group; G6: Saline-control negative group; G7: Tween 20-control negative group.a Significant viability decrease with *P* <0.05 in G2and G3 versus G1. b Significant viability decrease with *P<* 0.05 in G3 versus G2. Values having different superscripts within the same column are significantly different (*P* < 0.05). SE: standard error.
