# Supplementary material for: Bioactive metabolites of Streptomyces misakiensis display broad-spectrum antimicrobial activity against multidrug-resistant bacteria and fungi
Source: Front Cell Infect Microbiol. 2023 Apr 24;13:1162721. doi: 10.3389/fcimb.2023.1162721 (PMC10165089; doi:10.3389/fcimb.2023.1162721)
Supplement: Supplementary Table 1 — Inhibition Zone diameters of S. misakiensis and S. coeruleorubidus and minimum inhibitory concentration values of their bioactive metabolites against the tested bacteria and fungi. [file Table_1.xlsx]

## Sheet: Sheet1
Species	Source	Antibiogram	Inhibition zone diameter (mm) by disc diffusion method	MIC (µg/ml)
S. aureus			S. misakiensis	S.coeruleorubidus	Ursolic acid methyl ester	Thiocarbamic acid, N,N-dimethyl, S-1,3-diphenyl-2-butenyl ester
1	Mastitis	CRO, CAZ, OX, FA, TGC, DA, E, CN, FOF, TE	33 ± 1.32	0	0.125	ND
2	Mastitis	CRO, CAZ, OX, SXT, FA, TGC, DA, FOF	24 ± 0.96	0	1	ND
3	Mastitis	RA, CRO, CAZ, OX, SXT, FA, TGC, DA, FOF	30 ± 1.20	0	0.5	ND
4	Mastitis	RA, CRO, CAZ, OX, CIP	26 ± 1.04	0	1	ND
5	Mastitis	CN, RA, CRO, CAZ, OX, FA, TGC, DA, FOF	0	0	2	ND
6	Mastitis	CRO, CAZ, FA, TGC, DA, FOF	18 ± 0.72	0	0.25	ND
7	Mastitis	RA, CRO, CAZ, OX, SXT, FA, TGC, DA, FOF	0	0	ND	ND
8	Mastitis	RA, CRO, CAZ, OX, SXT, FA	25 ± 1.00	0	1	ND
9	Mastitis	RA, CRO, CAZ, OX, CIP, SXT, FA, TEC, TGC, DA, LNZ, TE	0	0	ND	ND
10	pus	CRO, CAZ, OX, FA, TGC, DO, LNZ, FOF, TE, E	28 ± 1.08	0	0. 125	ND
11	pus	RA, CAZ, TGC, DA, FOF	25 ± 1.00	0	0.25	ND
12	pus	CN, CIP, VA, FA, RA	22 ± 0.94	0	0.125	ND
13	pus	CN, DO, CIP, VA, FA, RA	29 ± 0.74	0	1	ND
14	pus	CIP, VA, FA, DO, RA	35±1.40	0	2	ND
Bacillus cereus ATCC11778	Food	IPM, CFZ, CAZ, FEP, TGC, FOF, CST	25 ± 0.72	0	0.5	ND
L. monocytogenes
1	Mastitis	CN, K, S, E, OX, SXT, FA, C, FOF, TEP, P, ATM, NA, CTX	20 ± 0.88	0	1	ND
2	Mastitis	K, RA, FA, FOF, TE, ATM, NA, CTX	30 ± 1.22	15 ± 1.09	0. 25	4
3	Mastitis	RA, OX, DO, IPM, FA, FOF, TE	35 ± 1.41	0	0.125	ND
4	Mastitis	DA, CHL, FA, FOF, TE, AMC, P, AM, ATM, NA, CTX	0	0	ND	ND
5	Mastitis	SXT, DA, FA, FOF, DO, P, AM, IPM, NA, CTX	0	0	ND	ND
6	Mastitis	K, RA, FA, FOF, TE, P, CHL, TE, P, ATM, NA, CTX	30 ± 1.23	0	0.25	ND
7	Mastitis	SXT, DA, FA, FOF, DO, CN, K, S, E, OX	25 ± 0.98	10 ±1.11	1	8
8	Mastitis	FA, FOF, TE, ATM, NA, CTX, ATM, NA, CTX	35 ± 1.42	15 ±2.00	0.25	4
S. equi
1	Strangles	CXM	29 ± 1.18	0	0.5	ND
2	Strangles	DO, CT, CXM	28 ± 1.22	0	0.5	ND
3	Strangles	SXT, CT, CRO, CXM, CEF	29±1.21	0	0.125	ND
4	Strangles	CXM, CHL, DO	29 ± 1.29	0	0.25	ND
5	Strangles	CEF, CXM, DO	29 ± 1.16	0	0.25	ND
6	Strangles	CRO, CXM, CN, DO	30 ±1.24	0	0.5	ND
7	Strangles	CXM, CN, CRO, DO, CTX	32 ± 1.20	0	0.5	ND
8	Strangles	CTX, STX, DO	33 ± 1.38	0	0.125	ND
9	Strangles	DO, CHL, CTX, STX, CXM, CRO	30 ±1.24	0	1	ND
10	Strangles	CT, DO, SXT, CT, CTX, CN, CRO, CXM	31± 1.22	0	0.125	ND
11	Strangles	CXM, CTX, STX, DO, CRO	27 ±1.08	0	1	ND
12	Strangles	STX, CXM, CTX, CRO	28 ±1.00	0	0.5	ND
	Strangles	CXM, CN, CXM, CTX, CRO, DO	32 ±1.29	0	0.125	ND
S. pyogenes
1	Mastitis	AMC, AX, CRO, CHL, CEP, SXT, TE, DA, CX, S	38 ± 2.07	18 ± 0.88	0.25	4
2	Mastitis	AMC, AX, CRO, CHL, FEP, SXT, S	32 ±1.75	25 ± 0.59	0.125	1
3	Mastitis	AMC, CEP, CHL,DA, SXT, TE, DA, CIP, E	30 ±1.11	22 ± 0.51	2	1
4	Mastitis	CX, CEP, CHL, E, S, AMC, SXT, TE	33±1.72	20 ± 0.67	2	2
S. agalactiae
1	Mastitis	AX, AMC, CX, CRO, CEP, CHL, FEB, S, DA CIP, TE, E, SXT	28 ±1.42	0	0.125	ND
2	Mastitis	CRO, AMX, CEP, CHL, SXT, CIP	23 ±0.66	0	0.5	ND
3	Mastitis	S, E, AX, AMX, CRO, DA, CX	25 ± 0.71	0	0.25	ND
4	Mastitis	AMX, TE, CIP, E, CHL,SXT	20 ± 0.63	0	1	ND
5	Mastitis	CRO, AMX, CEP, E, S, FEB	30 ±1.42	0	0.125	ND
6	Mastitis	AMX, DA, CEP, CIP, TE, AX	0	0	ND	ND
7	Mastitis	CRO, AMX, TE, CIP, CX	0	25 ±1.00	ND	1
E. coli
1	Mastitis	TET, CST, CFZ, CAZ, FEP, TGC, FOF, CST, AM	30 ±1.02	17 ±1.00	0.5	2
2	Mastitis	CEF, FOX, CFZ, CAZ, CRO, CST, TET, FOF, CST	37 ± 1.66	16 ±1.14	0.125	2
3	Mastitis	CEF, FOX, CFZ, CAZ, CRO, CST, TET	38 ± 1.80	14 ±1.00	0.125	4
4	Mastitis	CEF, FOX, CFZ, CAZ, CTX, AMC, AM, TPZ, CST AMC, AM, TPZ, FOF	33 ± 1.42	23 ±1.33	0.25	1
5	Mastitis	CEF, FOX, CFZ, CAZ, FEP, TGC, FOF, CST	50 ± 0.11	20 ±1.20	0.125	1
6	Mastitis	CEF, FOX, CFZ, CAZ, CTX, TGC	37 ± 2.36	22 ±0.88	1	1
7	Mastitis	AMC, AM, TPZ, FOF, CST, TET, CEF, FOX, CFZ, CAZ, CTX, NA	34 ± 2.10	16 ±1.71	0.5	2
8	Mastitis	CEF, FOX, CFZ, CAZ, CRO, FEP, SXT, AMC, AM, TPZ, CST, TET	34 ± 2.00	13 ±1.63	1	4
9	Mastitis	CEF, FOX, CFZ, CAZ, CTX, AMC, AM, TPZ, CST	40 ± 3.61	19 ±1.25	0.125	1
10	Mastitis	CN, CEF, CFZ, CAZ, CTX, CRO, FEP, NA, CIP, LVX, SXT, ATM, AMC, AM, TPZ, CHL, FOF, CST, TET	30 ± 1.85	15 ± 0.77	0.5	4
11	Mastitis	CEF, FOX, CFZ, CAZ, CRO, FEP, NA, CIP, LVX, SXT, ATM, AMC, AM, TPZ, CHL, FOF, CST	40 ± 3.01	14 ± 0.69	0.125	4
12	Mastitis	CEF, CFZ, CAZ, CTX, CRO, FEP, SXT, TGC, FOF, CST, AMC, AM, TPZ	28 ± 0.86	20 ± 0.49	1	1
13	Mastitis	CEF, CFZ, CAZ, CTX, CRO, AMC, AM, TPZ, CST, TET, TGC	38 ±1.99	13 ±1.01	0.5	4
14	Mastitis	CEF, CFZ, CAZ, CTX, CRO, FEP, CIP	37± 2.00	19 ±1.00	0.5	2
15	Mastitis	RA, SXT, TCG, ATM, AM, TPZ, AMC, CHL, CST	40 ± 2.18	30 ±1.79	0.125	0.5
16	Mastitis	CEF, CFZ, CAZ, CTX, CRO, AMC, AM, TPZ, CST, TET	30 ± 1.87	20 ±0.63	0.5	2
17	Mastitis	CEF, FOX, CFZ, CAZ, CRO, AM, AMC, TET	30 ± 1.02	20 ±1.00	0.5	1
P. aeruginosa
1	Mastitis	CEF, FOX, CFZ, CAZ, CRO, SXT, TCG, ATM, AM, TPZ, AMC, CHL, CST	30 ± 2.63	0	0.5	ND
2	Mastitis	TOB, CEF, FOX, CFZ, CAZ, CTX, CRO, TGC	25 ± 0.70	0	1	ND
K. pneumoniae
1	Mastitis	CEF ,CFZ, CAZ, CTX, CRO, FEP, SXT, TGC, FOF, CST, AMC, AM, TPZ	32 ± 1.66	22 ± 0.77	0.5	1
2	Mastitis	CEF, CFZ, CAZ, CTX, CRO, AMC, AM, TPZ, CST, TET, TGC	35 ± 1.97	0	0.125	ND
3	Mastitis	CEF, CFZ, CAZ, CTX, CRO, FEP, CIP	30 ± 2.74	0	0.5	ND
4	Mastitis	RA, SXT, TCG, ATM, AM, TPZ, AMC, CHL, CST	37 ± 3.96	0	0.125	ND
5	Mastitis	CEF, CFZ, CAZ, CTX, CRO, AMC, AM, TPZ, CST, TET	40 ± 4.63	0	0.125	ND
6	Mastitis	CEF, FOX, CFZ, CAZ, CRO, AM, AMC, TET	35 ± 1.86	0	0.25	ND
7	Mastitis	CEF, FOX, CFZ, CAZ, FOF, TET, AM, TPZ, AMC	35 ± 2.33	0	0.25	ND
8	Mastitis	CEF, FOX, CFZ, CAZ, CRO, SXT, TCG, ATM, AM, TPZ, AMC, CHL, CST	35 ± 1.95	20 ± 0.74	0.5	2
9	Mastitis	TOP, CEF, FOX, CFZ, CAZ, CTX, CRO, TGC	30 ±1.67	20 ± 0.41	0.5	2
10	Mastitis	CEF, FOX, CFZ, AM, AMC	29 ± 0.96	15 ± 0.79	1	4
11	Mastitis	CEF, CRO, TCG, SXT, ATM, FOF, TET, AMC, FOF, CHL, TET	35 ±1.71	27±1.00	0.125	1
A. hydrophila
1	Mastitis	AMC, AM, CAZ, CL, CFZ, SXT, TE, DO, CN, NA	34 ±1.36	25 ± 0.76	0.25	1
2	Mastitis	AMC, AM, CAZ, CL, CFZ, SXT, TE, DO, CT, NA	37± 3.00	22 ± 0.61	0.125	2
3	Mastitis	CN, CEF, FOX, CAZ, CTX, FEP, TGC, AMC, CHL, FOF, CST, TET	30 ± 1.97	20 ± 1.00	0.5	2
6	Mastitis	GN, CFZ, CAZ, CL, NOR, CEF, TGC, TE, DO, ATM, CST, NA	39 ± 4.01	33 ±1.27	0.125	0.5
7	Mastitis	GN, AMC, AM, CAZ,CL, NOR, CEF, TGC, TE, DO, CST	40 ± 3.96	33 ± 2.00	0.125	0.5
8	Mastitis	TOB, AX, CAZ, CL, NOR, CEF, TGC, TE, DO, CST	37 ± 3.99	32 ±1.61	0.25	1
10	Mastitis	TOB, AMC, AM, CAZ, FEP, CL, NOR , CEF, SXT, TE, DO, CST, NA	39 ± 4.05	20 ± 0.81	0.125	2
13	Mastitis	GN, TOB, AMC, TPZ, CAZ, CL, NOR, SXT, TE, DO, ATM, CST, NA	38 ± 3.80	28 ±1.01	0.125	0.5
15	Mastitis	FEP, CAZ, CL, NOR, CEF, SXT, TE, DO, CTZ, NA	32 ± 3.41	20 ± 0.75	0.5	2
16	Mastitis	CAZ, CL, NOR, CEF, SXT, TGC, TE, ATM, CT, CFZ	32 ±3.33	16 ± 0.61	0.5	4
17	Mastitis	AMC, AM, CFZ , CAZ, CL, CEF, TE, NA	37 ±4.11	13 ± 1.63	0.25	4
S. Typhi	Human stool	AM, AMC, CFZ, SAM, CRO, FEP, FOX TOP, CN, AK	25 ± 0.75	12 ± 1.00	1	4
S. Typhimurium	Human stool	AM, AMC, CFZ, CRO, CN, FEB, FOX, AK, CIP, TE, CTZ	30 ±1.00	18 ± 0.74	0.25	2
S. Typhimurium	Human stool	AMC, CST, CN, CRO, FEB, FOX, TOB, AK, CIP	28 ±1.02	16 ± 0.86	0.5	2
S. Typhimurium	Human stool	AMC, SAM, CFZ, CRO, FEB, ETB, AK, TOB, FOF, CTZ, TOB	29 ±1.11	12 ± 0.58	0.25	4
S. Typhimurium	Chicken cecum	AMC, SAM, CFZ, AM, CXM, CRO, FEB	30 ± 0.98	10 ± 0.55	0.25	8
S. Alfort	pigeon faeces	AM, AMC, CFZ, CRO, FEB, FOX, TOB, AK, CIP	30 ±1.01	0	0.5	ND
S. Infantis	duck faeces	AMC, CFZ, SAM, CN, CRO, FEB, ETB, TOB, SXT, ATM, FOF	34 ±1.12	15 ± 0.49	0.125	2
S. Apeyeme	turkey faeces	AMC, SAM, CFZ, AM, CXM, CRO, FEB, FOF, ETP, CIP, ATM, CTZ	31±1.23	0	0.5	ND
S. Daula	Chicken cecum	AM, AMC, CTZ, AM, CXM, CRO, FOF	33 ±1.42	0	0.25	ND
Un typed	Duck liver	AMC, CTZ, CXM, CRO, FOX, ETB	28 ± 0.82	10 ±1.00	1	8
S. Angers	Chicken gall bladedr	AM, AMC, SAM, CTZ, FEB, CRO, FOX, IPM, ETP, TE, FOS, SXT, CTZ	30 ±1.00	13 ± 1.36	0.5	4
S. Tamale	Chicken faeces	AM, AMC, SAM, CFZ, CN, CRO, FOX, ETB, IPM, MEM, CN, AK, TE,TGC	25 ± 0.75	20 ± 0.71	1	1
Flavobacterium columnare	Sea water	CN, CRO, FOX	33 ±1.88	0	0.5	ND
Candida albicans					Tetradecamethylcycloheptasiloxane
1	Sputum	FCZ, VCZ	35 ± 3.69	16 ± 0.69	0.5	2
2	Sputum	FCZ, ICZ, VCZ, AMB, TRB	39 ± 4.15	14 ± 1.63	0.25	4
3	Sputum	FCZ, ICZ, VCZ	28 ± 0.69	12 ±1.00	2	4
4	Sputum	FCZ, VCZ, AMB,TRB	33 ± 2.63	18 ± 1.00	0.5	2
5	Sputum	FCZ, ICZ, VCZ	31±1.85	20 ±1.02	1	2
6	Sputum	ICZ, VCZ	32 ±1.77	10 ± 0.75	0.25	8
7	Sputum	FCZ, TRB, VCZ	35 ± 3.21	15 ±1.36	0.5	4
8	Sputum	VCZ, AMB,ICZ	39 ± 4.10	17 ± 0.36	0.25	1
9	Sputum	FCZ, ICZ	42 ± 4.22	13 ± 2.00	0.125	4
10	Sputum	AMB,TRB, ICZ	39 ± 4.10	12 ± 0.63	0.5	8
11	Sputum	FCZ, VCZ,	39 ± 3.56	15 ± 1.00	0.25	4
12	Onychomycosis	VCZ, FCZ	21± 0.45	0	1	ND
13	Sputum	TRB, VCZ, ICZ	19 ± 0.38	0	2	ND
14	Sputum	VCZ,TRB, ICZ	30 ± 1.11	0	0.5	ND
15	Sputum	VCZ, AMB, TRB	24 ± 1.36	0	1	ND
16	Vaginal candidiasis	ICZ , VCZ, TRB	0	0	ND	ND
17	Sputum	FCZ,VCZ, TRB	20 ± 0.46	0	2	ND
18	Onychomycosis	FCZ, ICZ , VCZ, AMB	0	0	ND	ND
19	Sputum	FCZ, ICZ, VCZ	0	0	ND	ND
C. neoformans	Pigeon dropping	KCZ	32 ± 1.63	0	0.5	ND
C. neoformans	Pigeon dropping	KCZ, AMB, FCZ, VCZ	37 ± 2.96	0	0.25	ND
C. neoformans	Pigeon dropping	KCZ, AMB, VCZ	32±2.00	0	0.5	ND
C. gattii	Zoo bird dropping	KCZ, FCZ	34±2.56	0	0.25	ND
C. gattii	Zoo bird dropping	ND	35±1.96	0	0.125	ND
C. gattii	Olive tree	ND	20±0.77	0	1	ND
Aspergillus niger
1	Soil	VCZ , FCZ, ICZ, TRB	28 ± 0.87	12 ± 1.00	1	8
2	Soil	VCZ, ICZ	31 ± 1.07	0	0.5	ND
3	Soil	VCZ, FCZ, ICZ	25 ± 0.63	10 ± 0.63	1	16
4	Soil	VCZ ,FCZ,TRB	33 ± 1.33	14 ± 0.84	0.5	4
5	Soil	VCZ, FCZ, ICZ	40 ± 2.37	17 ± 0.63	0.125	2
6	Soil	FCZ, ICZ, TRB	34 ± 1.74	15 ± 0.70	0.5	4
7	Soil	FCZ, ICZ	28 ± 0.77	0	1	ND
Aspergillus flavus
1	Lung of chicken	VCZ, ICZ	27 ± 0.69	0	1	ND
2	Lung of chicken	VCZ, FCZ, ICZ	32 ± 1.36	24 ± 1.17	0.5	1
3	Soil	FCZ,TRB	33 ± 1.22	0	0.125	ND
Aspergillus fumigatus	Lung of chicken	VCZ , FCZ	29 ± 0.71	0	0.5	ND
AM: ampicillin; AMC: amoxicillin - clavulanic acid; CAZ: ceftazidime; CIP: ciprofloxacin; CN: gentamicin; CTX: cefoxitin; LEV: levofloxacin; SAM: ampicillin/sulbactam; TOB: tobramycin; TE: tetracycline; NA: nalidixic acid; DO: doxycyclin; CEF: cefalexin; FOX: cefoxitin; CFZ: cefazolin; CAZ; ceftazidime, CRO; ceftriaxone, TET; tetracyclines, CZ; cefazolin, DA: clindamycin, NOR; norfloxacin, ATM; A…
